# Supplementary material for: One-step construction of Y, C, and O tridoped g-C3N4 as a bifunctional photocatalyst for H2 evolution and organic pollutant degradation under visible light irradiation
Source: Royal Society of Chemistry journal article supplement (doi:10.1039/d2se00525e), 2022-01-01
Supplement: d2se00525e1.pdf [file d2se00525e1.pdf]

## Supplementary Information

# One-step Construction of Y, C, and O Tridoped g-C<sub>3</sub>N<sub>4</sub> as Bifunctional Photocatalyst for H<sub>2</sub> Evolution and Organic Pollutants Degradation under Visible Light Irradiation

Ahmed E. Hassan<sup>a,b,c</sup>, Mai S. A. Hussien<sup>d,e</sup>, Mohamed Hammad Elsayed<sup>c,f</sup>, Mohamed Gamal Mohamed<sup>g,h</sup>, Shiao-Wei Kuo<sup>g</sup>, Ho-Hsiu Chou<sup>f</sup>, Ibrahim S. Yahia<sup>i,j,k</sup>, Genxiang Wang<sup>a,\*</sup>,  
Zhenhai Wen<sup>a,\*</sup>

<sup>a</sup>CAS Key Laboratory of Design and Assembly of Functional Nanostructures, and Fujian Provincial Key Laboratory of Nanomaterials, Fujian Institute of Research on the Structure of Matter, Chinese Academy of Sciences, Fuzhou, Fujian, 350002, China.

<sup>b</sup>University of Chinese Academy of Sciences, Beijing, 100049, China.

<sup>c</sup>Department of Chemistry, Faculty of Science, Al-Azhar University, Nasr City 11884, Cairo, Egypt.

<sup>d</sup>Department of Chemistry, Faculty of Education, Ain Shams University, Roxy, Cairo 11757, Egypt.

<sup>e</sup>Nanoscience Laboratory for Environmental and Bio-medical Applications (NLEBA), Department of Physics, Faculty of Education, Ain Shams University, Roxy, Cairo 11757, Egypt.

<sup>f</sup>Department of Chemical Engineering, National Tsing Hua University, Hsinchu, 30013, Taiwan

<sup>g</sup>Department of Materials and Optoelectronic Science, Center of Crystal Research, National Sun Yat-Sen University, Kaohsiung 80424, Taiwan.

<sup>h</sup>Chemistry Department, Faculty of Science, Assiut University, Assiut 71516, Egypt.

<sup>i</sup>Research Center for Advanced Materials Science (RCAMS), King Khalid University, Abha 61413, P.O. Box 9004, Saudi Arabia.

<sup>j</sup>Advanced Functional Materials & Optoelectronic Laboratory (AFMOL), Department of Physics, Faculty of Science, King Khalid University, P.O. Box 9004, Abha, Saudi Arabia.

<sup>k</sup>Semiconductor Lab., Department of Physics, Faculty of Education, Ain Shams University, Roxy, 11757 Cairo, Egypt.

**\*Corresponding author**

E-mail: [wgx@fjirsm.ac.cn](mailto:wgx@fjirsm.ac.cn) (Genxinag Wang), [wen@fjirsm.ac.cn](mailto:wen@fjirsm.ac.cn) (Zhenhai Wen)

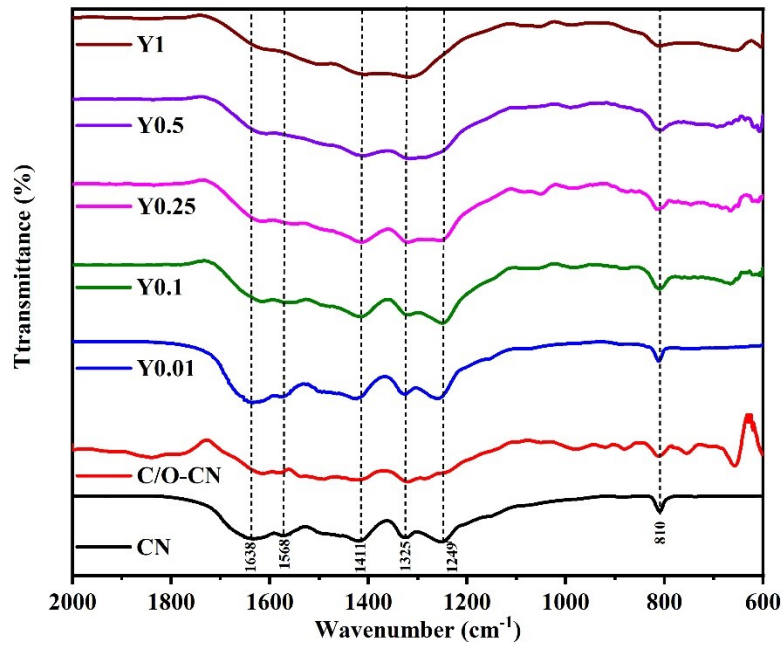

**Fig. S1.** FT-IR spectra in the range of 600  $\text{cm}^{-1}$  to 2000  $\text{cm}^{-1}$  of CN and doped CN samples.

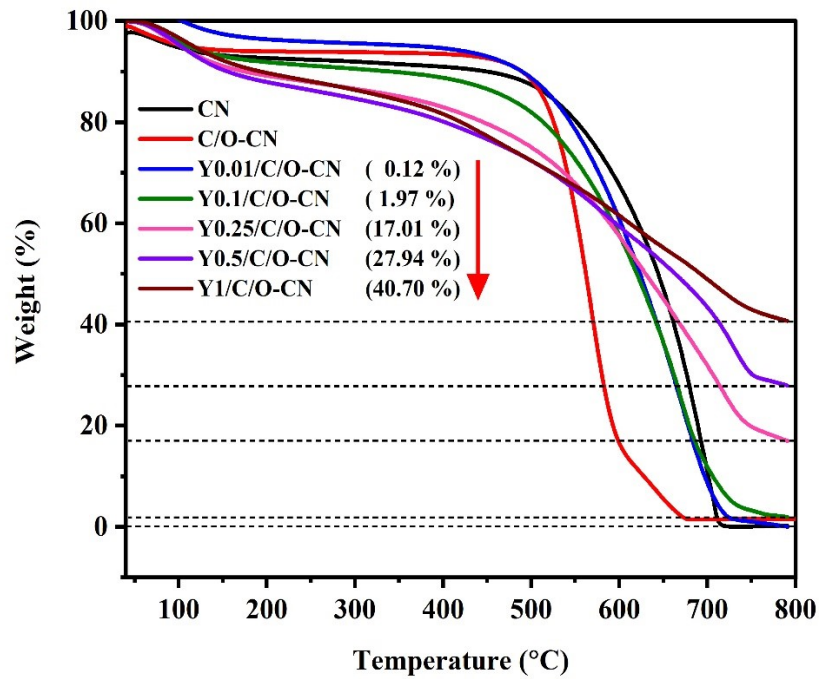

**Fig. S2.** TGA curves of bulk-CN, C/O-CN, and  $\text{Y}_x/\text{C}/\text{O}$  tridoped CN samples.

## SEM Images

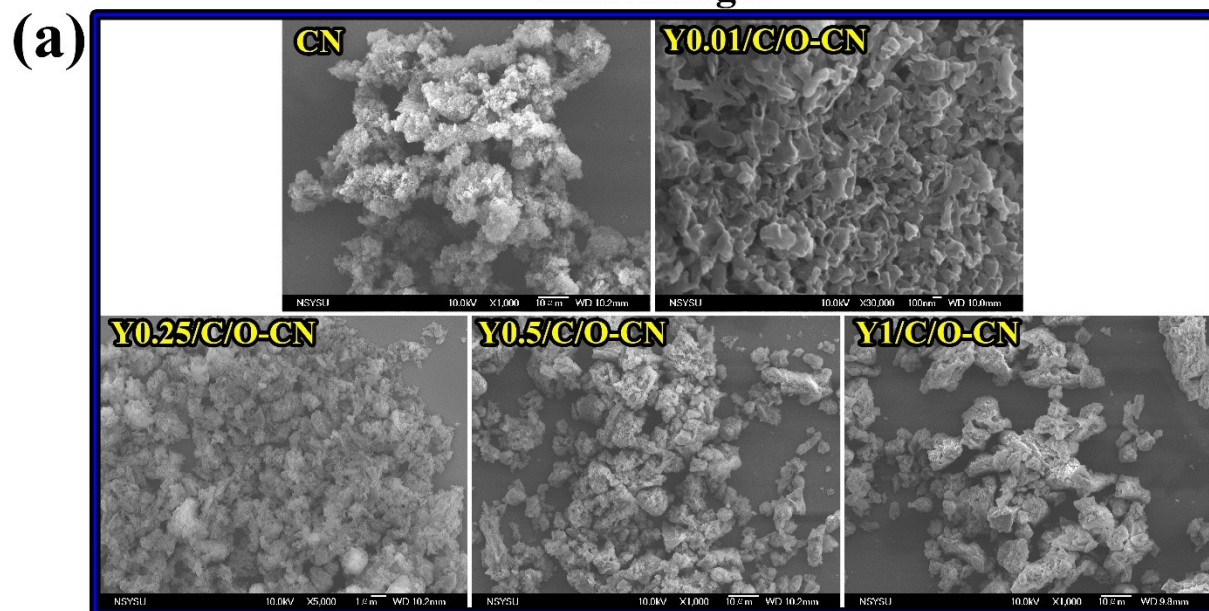

## TEM Images

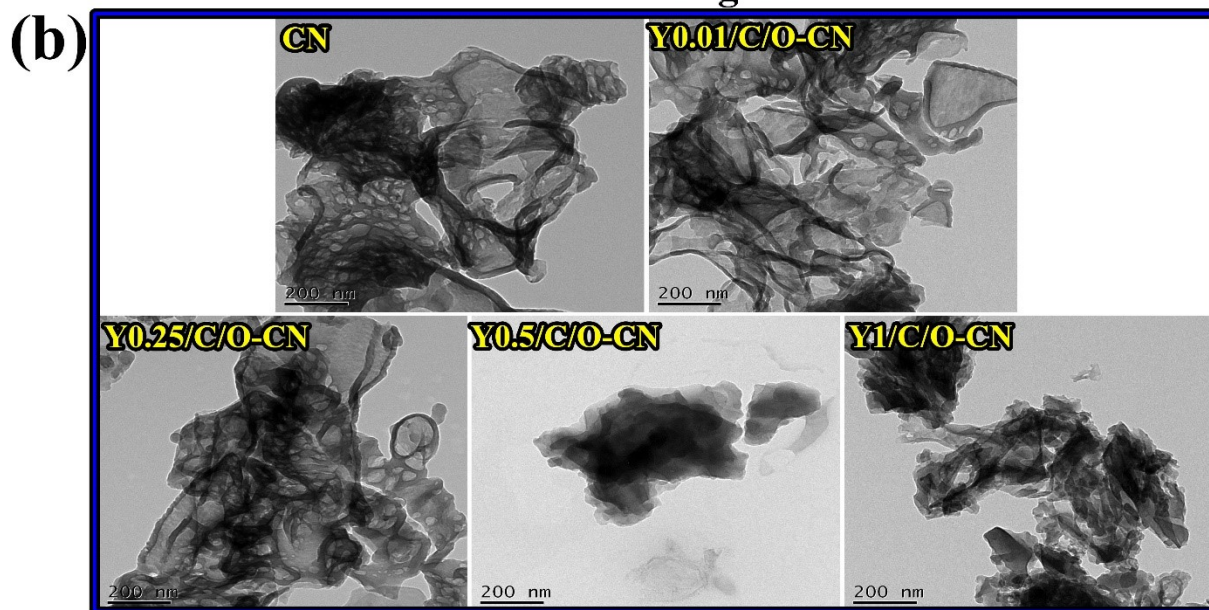

Fig. S3. (a) SEM images and (b) TEM images of bulk-CN and Y<sub>x</sub>/C/O tridoped CN samples.

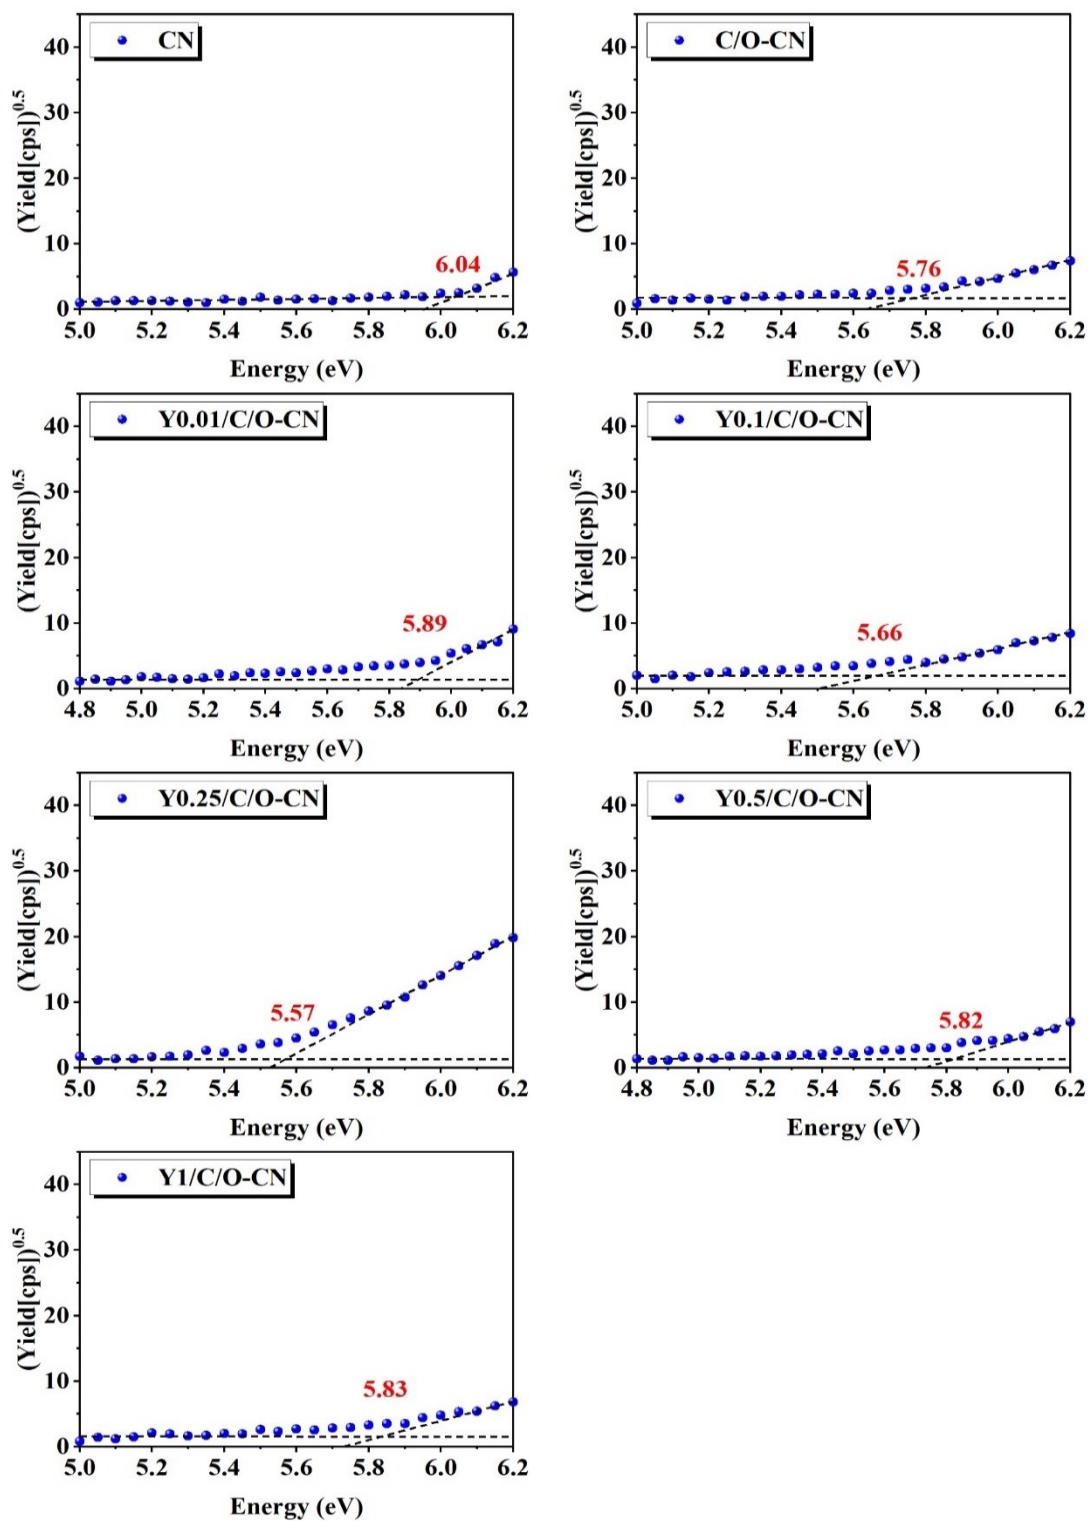

**Fig. S4.** Calculated valence band (VB) edges of CN and doped CN samples by photoelectron spectroscopy (model: AC-2).

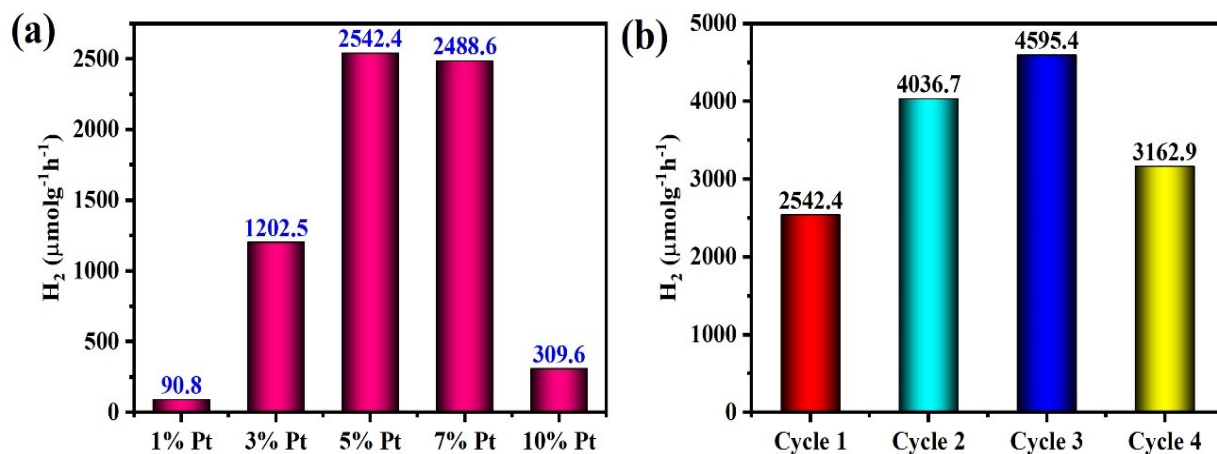

**Fig. S5.** (a) Effect of Pt co-catalyst concentration on photocatalytic H<sub>2</sub> evolution with Y0.1/C/O-CN and (b) stability test of Y0.1/C/O-CN for H<sub>2</sub> evolution.

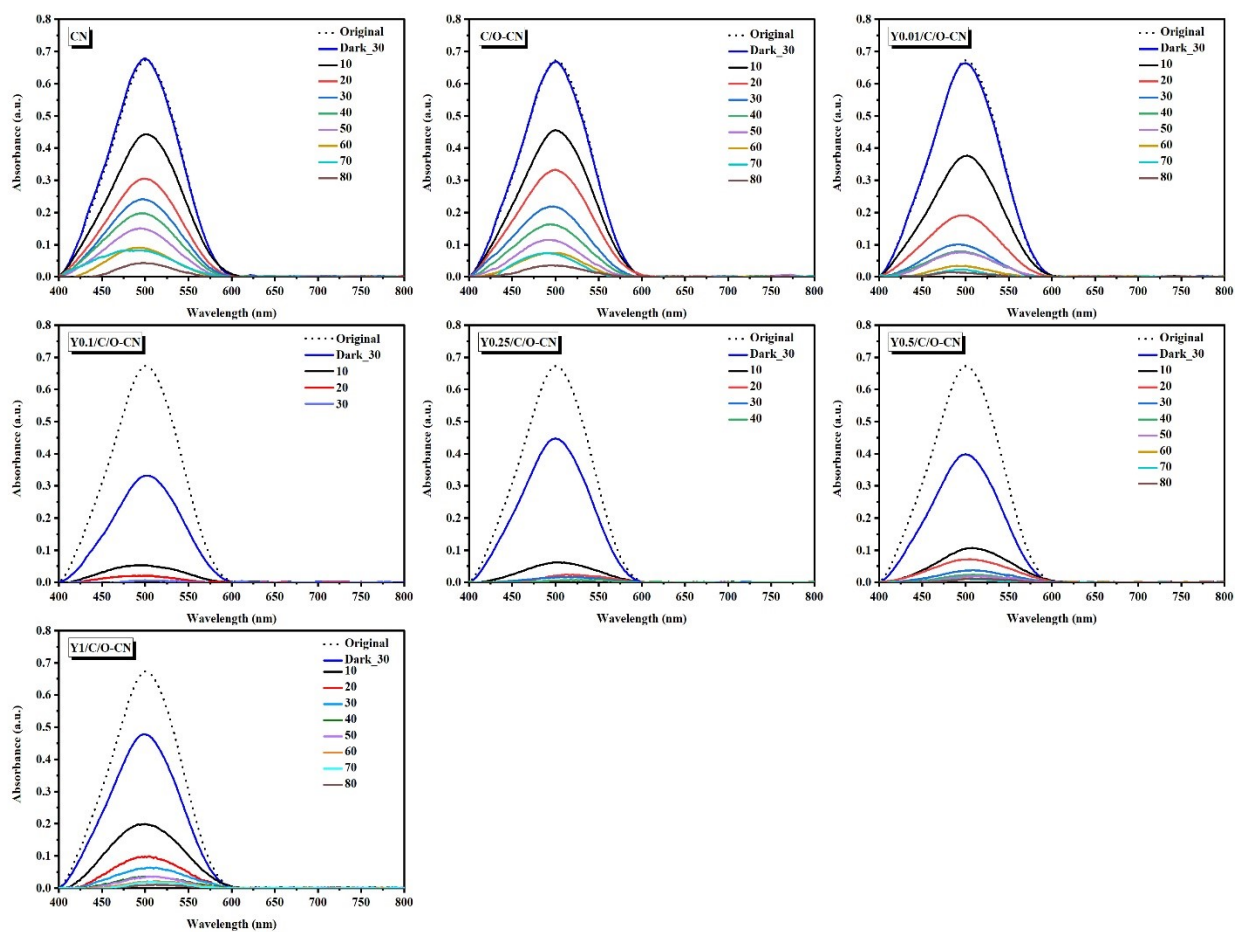

**Fig. S6.** The time-dependent absorption spectra of photocatalytic degradation of congo red (CR) dye under visible light irradiation with different photocatalysts.

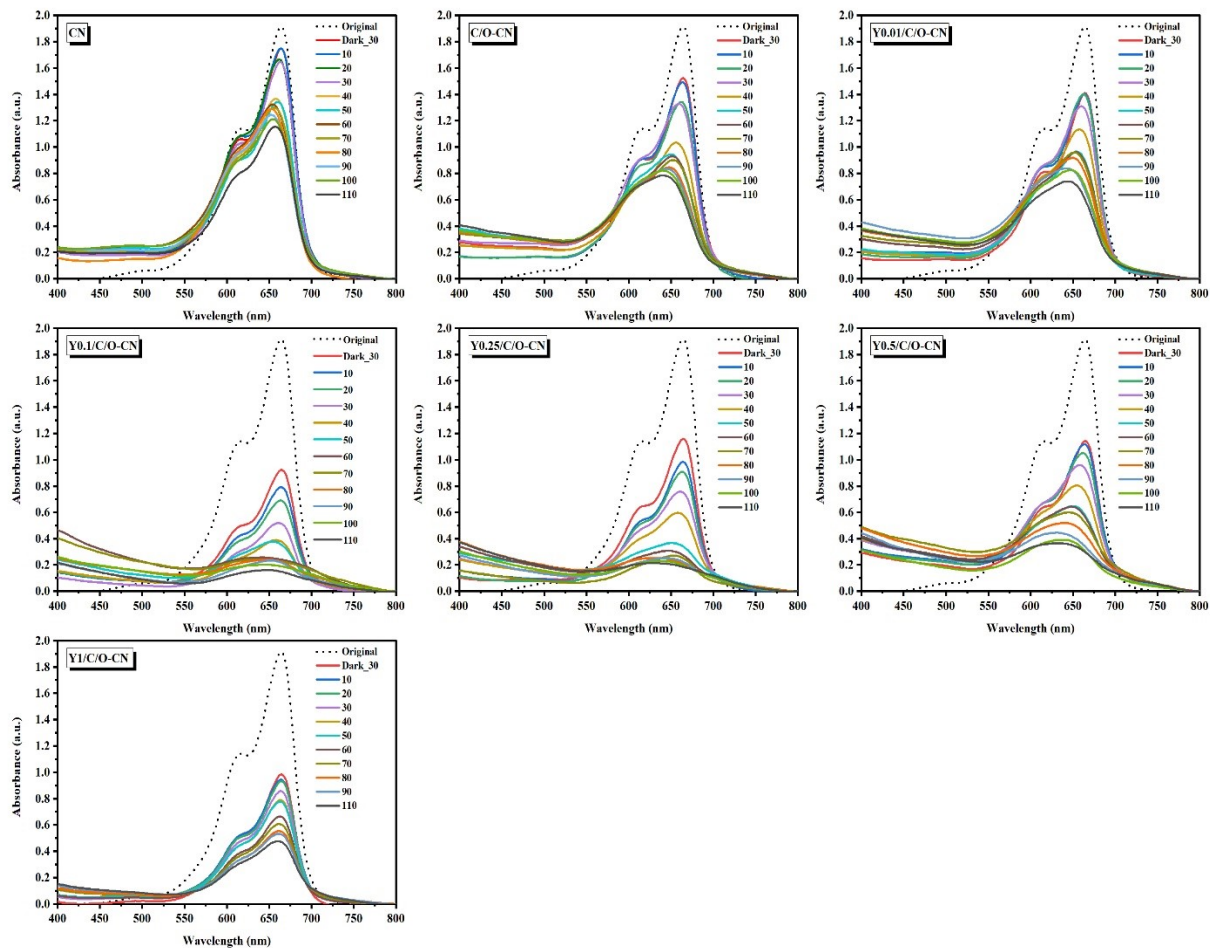

**Fig. S7.** The time-dependent absorption spectra of photocatalytic degradation of methylene blue (MB) dye under visible light irradiation with different photocatalysts.



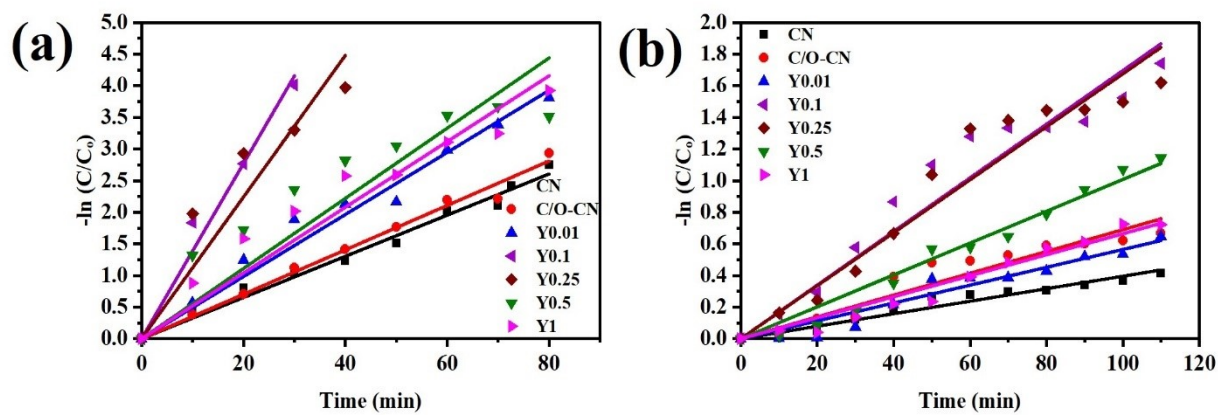

**Fig. S8.**  $-\ln(C/C_0)$  versus reaction time plots for (a) CR and (b) MB degradation over bulk-CN, C/O-CN, and Yx/C/O tridoped CN, respectively.

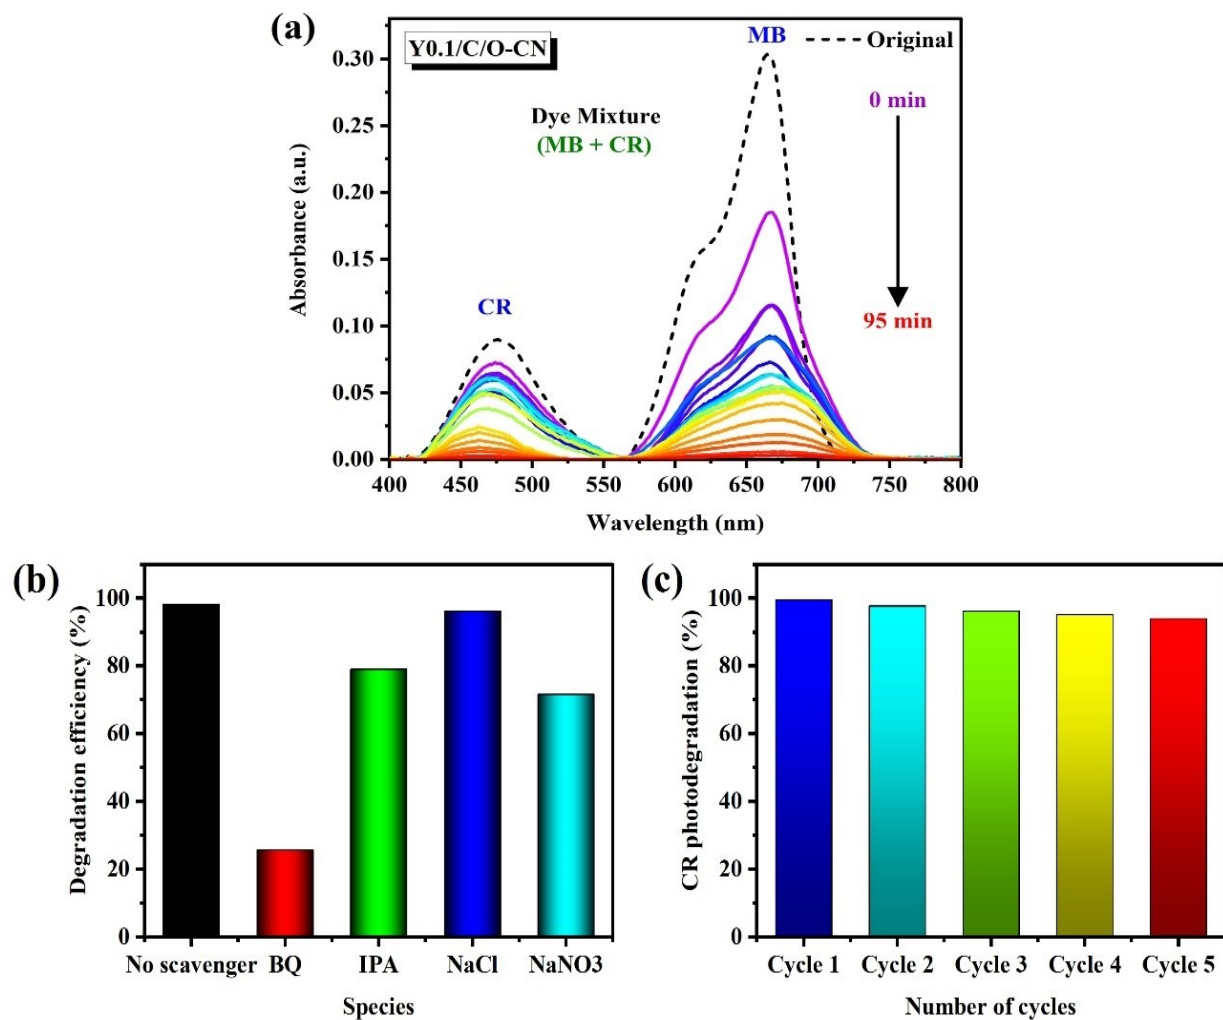

**Fig. S9.** (a) UV-visible absorbance of the model dye mixture (CR and MB) with the Y0.1/C/O-CN photocatalyst. (b) The effect of different scavengers on the CR photodegradation by Y0.1/C/O-CN, and (c) the reusability of Y0.1/C/O-CN photocatalyst for the degradation of CR.

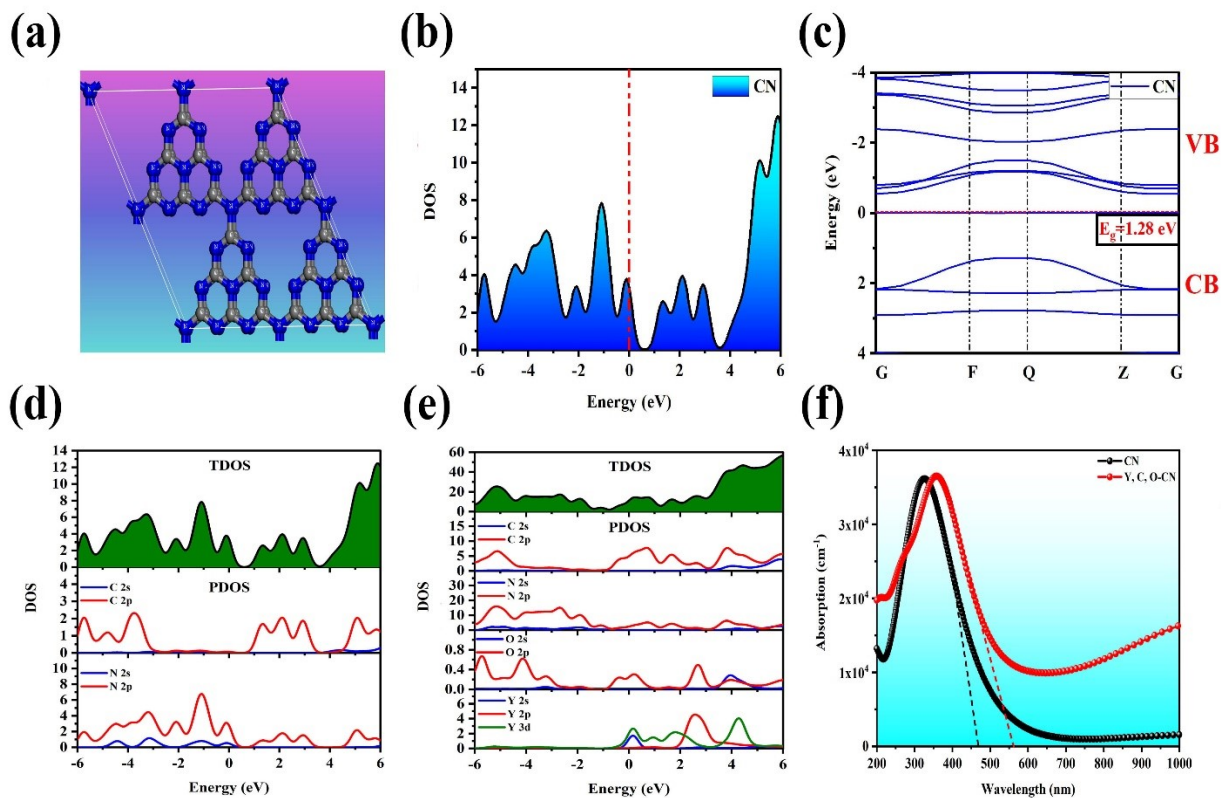

**Fig. S10.** (a) Optimized  $2 \times 2 \times 1$  supercell structure used in the DFT calculations, (b) calculated DOS diagram, and (c) corresponding band structure of pure CN, respectively. (d,e) TDOS and PDOS of pure CN and Y, C, O tridoped CN, respectively. (f) Optical absorption curve of pure CN and Y, C, O tridoped CN.

**Table S1:** XRD data information of CN and doped CN samples.

| <b>Samples</b> | <b>Average crystallite size<br/>(nm)</b> | <b>Dislocation density<br/>(<math>\times 10^{-19} \text{ m}^{-2}</math>)</b> | <b>Lattice strain<br/>(<math>\times 10^{-2}</math>)</b> |
|----------------|------------------------------------------|------------------------------------------------------------------------------|---------------------------------------------------------|
| CN             | 2.569                                    | 1.529                                                                        | 1.353                                                   |
| C/O-CN         | 1.876                                    | 2.841                                                                        | 1.848                                                   |
| Y0.01/C/O-CN   | 2.053                                    | 2.372                                                                        | 1.688                                                   |
| Y0.1/C/O-CN    | 2.409                                    | 1.726                                                                        | 1.440                                                   |
| Y0.25/C/O-CN   | 2.059                                    | 2.402                                                                        | 1.694                                                   |
| Y0.5/C/O-CN    | 1.879                                    | 3.107                                                                        | 1.903                                                   |
| Y1/C/O-CN      | 1.557                                    | 4.375                                                                        | 2.271                                                   |

**Table S2:** Surface elemental composition determined by XPS of pure-CN, C-O/CN, and Y<sub>x</sub>/C/O-CN samples.

| Sample                                   | Atomic (%) |       |       |       | C/N ratio |
|------------------------------------------|------------|-------|-------|-------|-----------|
|                                          | C          | N     | O     | Y     |           |
| <b>g-C<sub>3</sub>N<sub>4</sub> (CN)</b> | 44.13      | 53.91 | 1.970 | -     | 0.819     |
| <b>C/O-CN</b>                            | 44.73      | 53.02 | 2.252 | -     | 0.844     |
| <b>Y0.01/C/O-CN</b>                      | 44.06      | 52.51 | 3.351 | 0.081 | 0.839     |
| <b>Y0.1/C/O-CN</b>                       | 43.10      | 51.23 | 5.030 | 0.640 | 0.841     |
| <b>Y0.25/C/O-CN</b>                      | 41.92      | 46.64 | 9.662 | 1.782 | 0.899     |
| <b>Y0.5/C/O-CN</b>                       | 41.48      | 42.83 | 12.66 | 3.020 | 0.968     |
| <b>Y1/C/O-CN</b>                         | 39.49      | 32.59 | 22.39 | 5.531 | 1.212     |

**Table S3:** XPS C 1s spectra results of CN, C/O-CN, and Y0.1/ C/O-CN.

| Sample             | (N=C-(N) <sub>2</sub> ) | (C-C) | (C-O) | (N=C-(N) <sub>2</sub> ) / (C-C) ratio |
|--------------------|-------------------------|-------|-------|---------------------------------------|
| <b>Pure-CN</b>     | 88.4                    | 10.2  | 1.4   | 8.65                                  |
| <b>C/O-CN</b>      | 85.3                    | 12.1  | 2.6   | 7.08                                  |
| <b>Y0.1/C/O-CN</b> | 85.4                    | 12.7  | 1.9   | 6.71                                  |

**Table S4:** XPS N 1s spectra results of CN, C/O-CN, and Y0.1/ C/O-CN.

| Sample      | (C=N-C) | (N-(C) <sub>3</sub> ) | (-NH <sub>x</sub> ) |
|-------------|---------|-----------------------|---------------------|
| Pure-CN     | 59.6    | 29.2                  | 11.2                |
| C/O-CN      | 52.4    | 36.4                  | 11.2                |
| Y0.1/C/O-CN | 48.9    | 39.4                  | 11.7                |

**Table S5:** XPS O 1s spectra results of CN, C/O-CN, and Y0.1/ C/O-CN.

| Sample      | (H <sub>2</sub> O) | (O <sub>2</sub> ) | (C-O) |
|-------------|--------------------|-------------------|-------|
| Pure-CN     | 82.5               | 11.6              | 5.9   |
| C/O-CN      | 58.4               | 25.1              | 16.5  |
| Y0.1/C/O-CN | 57.7               | 27.6              | 14.7  |

**Table S6:** BET surface area, pore size distribution, and bandgap energy ( $E_g$ ) of pure-CN, C/O-CN, C/O-CN, and  $Y_x$ /C/O-CN samples.

| Sample                                   | BET surface area ( $m^2/g$ ) | Pore volume ( $cm^3/g$ ) | Bandgap (eV) |
|------------------------------------------|------------------------------|--------------------------|--------------|
| <b>g-C<sub>3</sub>N<sub>4</sub> (CN)</b> | 62.07                        | 0.054                    | 2.75         |
| <b>C/O-CN</b>                            | 36.91                        | 0.034                    | 1.86         |
| <b>Y.01/C/O-CN</b>                       | 43.47                        | 0.051                    | 1.88         |
| <b>Y0.1/C/O-CN</b>                       | 80.39                        | 0.112                    | 1.90         |
| <b>Y0.25/C/O-CN</b>                      | 73.90                        | 0.125                    | 2.11         |
| <b>Y0.5/C/O-CN</b>                       | 46.35                        | 0.123                    | 2.15         |
| <b>Y1/C/O-CN</b>                         | 28.76                        | 0.119                    | 2.27         |

**Table S7:** Comparison of photocatalytic activity of Y<sub>x</sub>/C/O tridoped g-C<sub>3</sub>N<sub>4</sub> (x= 0.01, 0.1, 0.25, 0.5, and 1 g) for H<sub>2</sub> evolution and the corresponding AQY with other g-C<sub>3</sub>N<sub>4</sub> based photocatalysts.

| Photocatalyst                                                           | Experimental details                                      | Light source               | HER<br>( $\mu\text{mol h}^{-1} \text{g}^{-1}$ ) | AQY (%)<br>(420nm) | Ref. |
|-------------------------------------------------------------------------|-----------------------------------------------------------|----------------------------|-------------------------------------------------|--------------------|------|
| <b>g-C<sub>3</sub>N<sub>4</sub>-Based Heterojunction Photocatalysts</b> |                                                           |                            |                                                 |                    |      |
| N-doped MoS <sub>2</sub> /<br>S-doped g-C <sub>3</sub> N <sub>4</sub>   | Water/ TEOA/ Pt                                           | 300 W Xe lamp<br>(>420 nm) | 659                                             | -                  | 1    |
| CdS QDs/<br>P-doped g-C <sub>3</sub> N <sub>4</sub>                     | Water/ Na <sub>2</sub> S/ Na <sub>2</sub> SO <sub>3</sub> | 300 W Xe lamp<br>(>420 nm) | 1579                                            | -                  | 2    |
| B-doped g-C <sub>3</sub> N <sub>4</sub> /<br>ZnO                        | Water/ TEOA/ Pt                                           | 300 W Xe lamp<br>(>420 nm) | 357                                             | 3.29<br>(240 nm)   | 3    |
| <b>Monodoped g-C<sub>3</sub>N<sub>4</sub> Photocatalysts</b>            |                                                           |                            |                                                 |                    |      |
| S-doped g-C <sub>3</sub> N <sub>4</sub><br>nanosheets                   | Water/ TEOA/ Pt                                           | 300 W Xe lamp<br>(>420 nm) | 982                                             | -                  | 4    |
| Br-doped g-C <sub>3</sub> N <sub>4</sub>                                | Water/ TEOA/ Pt                                           | 300 W Xe lamp<br>(>420 nm) | 960                                             | -                  | 5    |
| Cl-doped g-C <sub>3</sub> N <sub>4</sub>                                | Water/ lactic acid/ Pt                                    | 300 W Xe lamp<br>(>420 nm) | 537                                             | 13.7               | 6    |
| P-doped g-C <sub>3</sub> N <sub>4</sub>                                 | Water/ TEOA/ Pt                                           | 300 W Xe lamp<br>(>420 nm) | 1596                                            | 3.6                | 7    |
| C-doped g-C <sub>3</sub> N <sub>4</sub>                                 | Water/ TEOA/ Pt                                           | 300 W Xe lamp<br>(>400 nm) | 178                                             | -                  | 8    |
| F-doped g-C <sub>3</sub> N <sub>4</sub>                                 | Water/ TEOA/ Pt                                           | 300 W Xe lamp<br>(>420 nm) | 745                                             | -                  | 9    |
| O-doped porous<br>network g-C <sub>3</sub> N <sub>4</sub>               | Water/ TEOA/ Pt                                           | 300 W Xe lamp<br>(>420 nm) | 1204                                            | 7.8                | 10   |
| O-doped porous<br>g-C <sub>3</sub> N <sub>4</sub>                       | Water/ TEOA/ Pt                                           | 300 W Xe lamp<br>(>420 nm) | 1430                                            | -                  | 11   |
| O-doped g-C <sub>3</sub> N <sub>4</sub>                                 | Water/ TEOA/ Pt                                           | 300 W Xe lamp<br>(>420 nm) | 772                                             | 8.6                | 12   |



|                                                                |                        |                                       |             |          |                  |
|----------------------------------------------------------------|------------------------|---------------------------------------|-------------|----------|------------------|
| K-doped g-C <sub>3</sub> N <sub>4</sub>                        | Water/ TEOA/ Pt        | 300 W Xe lamp<br>(>420 nm)            | 1028        | -        | 13               |
| <b>Codoped g-C<sub>3</sub>N<sub>4</sub> Photocatalysts</b>     |                        |                                       |             |          |                  |
| Mo-S codoped porous g-C <sub>3</sub> N <sub>4</sub> nanosheets | Water/ TEOA/ Pt        | 300 W Xe lamp<br>(>420 nm)            | 294         | 0.24     | 14               |
| P-Na codoped g-C <sub>3</sub> N <sub>4</sub>                   | Water/ TEOA/ Pt        | 300 W Xe lamp<br>(>400 nm)            | 2032        | 6.8      | 15               |
| Fe-P codoped g-C <sub>3</sub> N <sub>4</sub>                   | Water/ methanol / Pt   | 250 W Na lamp<br>(>400 nm)            | 122         | 6.9      | 16               |
| C-O codoped g-C <sub>3</sub> N <sub>4</sub>                    | Water/ TEOA/ Pt        | 300 W Xe lamp<br>(>420 nm)            | 1101        | -        | This work        |
| <b>Tridoped g-C<sub>3</sub>N<sub>4</sub> Photocatalysts</b>    |                        |                                       |             |          |                  |
| S-P-O tridoped g-C <sub>3</sub> N <sub>4</sub> nanosheet       | Water/ TEOA/ Pt        | 300 W Xe lamp<br>(>420 nm)            | 2480        | -        | 17               |
| Y0.01-C-O tridoped g-C <sub>3</sub> N <sub>4</sub>             | Water/ TEOA/ Pt        | 300 W Xe lamp<br>(>420 nm)            | 2212        | -        | This work        |
| <b>Y0.1-C-O tridoped g-C<sub>3</sub>N<sub>4</sub></b>          | <b>Water/ TEOA/ Pt</b> | <b>300 W Xe lamp<br/>(&gt;420 nm)</b> | <b>2543</b> | <b>6</b> | <b>This work</b> |
| Y0.25-C-O tridoped g-C <sub>3</sub> N <sub>4</sub>             | Water/ TEOA/ Pt        | 300 W Xe lamp<br>(>420 nm)            | 958         | -        | This work        |
| Y0.5-C-O tridoped g-C <sub>3</sub> N <sub>4</sub>              | Water/ TEOA/ Pt        | 300 W Xe lamp<br>(>420 nm)            | 335         | -        | This work        |
| Y1-C-O tridoped g-C <sub>3</sub> N <sub>4</sub>                | Water/ TEOA/ Pt        | 300 W Xe lamp<br>(>420 nm)            | 59          | -        | This work        |

---

**Table S8:** Comparison of photocatalytic activity of Yx/C/O tridoped g-C<sub>3</sub>N<sub>4</sub> (x= 0.01, 0.1, 0.25, 0.5, and 1 g) for pollutant degradation with other g-C<sub>3</sub>N<sub>4</sub> based photocatalyst.

| Photocatalyst                                                                                           | Catalyst dose (g/L) | Dye Used  | Dye Conc. (ppm) | Light source                        | Degradation (%) | Time (min) | Ref.             |
|---------------------------------------------------------------------------------------------------------|---------------------|-----------|-----------------|-------------------------------------|-----------------|------------|------------------|
| <b>CR Photodegradation</b>                                                                              |                     |           |                 |                                     |                 |            |                  |
| S-doped g-C <sub>3</sub> N <sub>4</sub> /TiO <sub>2</sub>                                               | 0.2                 | CR        | 50              | 300 W Xe lamp                       | 95              | 60         | 18               |
| g-C <sub>3</sub> N <sub>4</sub> /RGO/Bi <sub>2</sub> Fe <sub>4</sub> O <sub>9</sub>                     | 0.5                 | CR        | 10              | 30 W LED lamp (>420 nm)             | 87.7            | 60         | 19               |
| CoFe <sub>2</sub> O <sub>4</sub> /g-C <sub>3</sub> N <sub>4</sub>                                       | 0.5                 | CR        | 25              | 150 W Xe lamp simulated solar light | ~100%           | 90         | 20               |
| <i>(In the presence of 30%H<sub>2</sub>O<sub>2</sub>)</i><br>Exfoliated g-C <sub>3</sub> N <sub>4</sub> | 1                   | CR        | 100             | Solar irradiation                   | 95.1            | 60         | 21               |
| g-C <sub>3</sub> N <sub>4</sub> /precipitated silica                                                    | 2                   | CR        | 60              | 300 W Xe lamp (>400 nm)             | 88              | 360        | 22               |
| Acid-etched template free g-C <sub>3</sub> N <sub>4</sub>                                               | 0.05                | CR        | 10              | Visible light                       | 90.08           | 150        | 23               |
| C-O codoped g-C <sub>3</sub> N <sub>4</sub>                                                             | 0.2                 | CR        | 50              | 18 W LED lamp (>420 nm)             | 94.7            | 80         | This work        |
| Y0.01-C-O tridoped g-C <sub>3</sub> N <sub>4</sub>                                                      | 0.2                 | CR        | 50              | 18 W LED lamp (>420 nm)             | 97.8            | 80         | This work        |
| <b>Y0.1-C-O tridoped g-C<sub>3</sub>N<sub>4</sub></b>                                                   | <b>0.2</b>          | <b>CR</b> | <b>50</b>       | <b>18 W LED lamp (&gt;420 nm)</b>   | <b>98.5</b>     | <b>30</b>  | <b>This work</b> |
| Y0.25-C-O tridoped g-C <sub>3</sub> N <sub>4</sub>                                                      | 0.2                 | CR        | 50              | 18 W LED lamp (>420 nm)             | 98.1            | 40         | This work        |
| Y0.5-C-O tridoped g-C <sub>3</sub> N <sub>4</sub>                                                       | 0.2                 | CR        | 50              | 18 W LED lamp (>420 nm)             | 97.0            | 80         | This work        |
| Y1-C-O tridoped g-C <sub>3</sub> N <sub>4</sub>                                                         | 0.2                 | CR        | 50              | 18 W LED lamp (>420 nm)             | 98.0            | 80         | This work        |
| <b>MB Photodegradation</b>                                                                              |                     |           |                 |                                     |                 |            |                  |
| Li-doped g-C <sub>3</sub> N <sub>4</sub>                                                                | 0.2                 | MB        | 30              | 300 W Xe lamp (>470 nm)             | 90              | 180        | 24               |
| Ca-doped NaNbO <sub>3</sub> /g-C <sub>3</sub> N <sub>4</sub>                                            | 0.4                 | MB        | 1               | 85 W CFL lamp                       | 100             | 240        | 25               |
| ZnO/Au/g-C <sub>3</sub> N <sub>4</sub>                                                                  | 0.5                 | MB        | 10              | 300 W Xe lamp                       | 99              | 120        | 26               |
| g-C <sub>3</sub> N <sub>4</sub> /H-ZSM-5                                                                | 0.1                 | MB        | 5               | None                                | 92              | 120        | 27               |

|                                                                                     |            |               |               |                                     |             |            |                  |
|-------------------------------------------------------------------------------------|------------|---------------|---------------|-------------------------------------|-------------|------------|------------------|
| g-C <sub>3</sub> N <sub>4</sub> /RGO/Bi <sub>2</sub> Fe <sub>4</sub> O <sub>9</sub> | 0.5        | MB            | 10            | 30 W LED (>420 nm)                  | 87.7        | 60         | 19               |
| UiO-66/g-C <sub>3</sub> N <sub>4</sub>                                              | 0.25       | MB            | 10            | 350 W Xe lamp (>420 nm)             | ~100        | 240        | 28               |
| Sm <sub>2</sub> O <sub>3</sub> /S-doped g-C <sub>3</sub> N <sub>4</sub>             | 0.7        | MB            | 8             | 300 W Halogen lamp (>400 nm)        | 93          | 150        | 29               |
| Porous CeO <sub>2</sub> /S-doped g-C <sub>3</sub> N <sub>4</sub>                    | -          | MB            | 7             | 300 W Halogen lamp (>400 nm)        | 91          | 150        | 30               |
| ZnS/g-C <sub>3</sub> N <sub>4</sub>                                                 | 0.15       | MB            | 6             | 100 W Halogen lamp                  | 90          | 100        | 31               |
| g-C <sub>3</sub> N <sub>4</sub> /Cu <sub>2</sub> O                                  | 0.5        | MB            | 3.1           | 400 W Na lamp                       | 81          | 120        | 32               |
| C-O codoped g-C <sub>3</sub> N <sub>4</sub>                                         | 0.2        | MB            | 10            | 18 W LED lamp (>420 nm)             | 48.6        | 110        | This work        |
| Y0.01-C-O tridoped g-C <sub>3</sub> N <sub>4</sub>                                  | 0.2        | MB            | 10            | 18 W LED lamp (>420 nm)             | 47.6        | 110        | This work        |
| <b>Y0.1-C-O tridoped g-C<sub>3</sub>N<sub>4</sub></b>                               | <b>0.2</b> | <b>MB</b>     | <b>10</b>     | <b>18 W LED lamp (&gt;420 nm)</b>   | <b>82.4</b> | <b>110</b> | <b>This work</b> |
| Y0.25-C-O tridoped g-C <sub>3</sub> N <sub>4</sub>                                  | 0.2        | MB            | 10            | 18 W LED lamp (>420 nm)             | 80.2        | 110        | This work        |
| Y0.5-C-O tridoped g-C <sub>3</sub> N <sub>4</sub>                                   | 0.2        | MB            | 10            | 18 W LED lamp (>420 nm)             | 68.1        | 110        | This work        |
| Y1-C-O tridoped g-C <sub>3</sub> N <sub>4</sub>                                     | 0.2        | MB            | 10            | 18 W LED lamp (>420 nm)             | 51.5        | 110        | This work        |
| <b>Mixed Dyes Photodegradation</b>                                                  |            |               |               |                                     |             |            |                  |
| <b>Y0.1-C-O tridoped g-C<sub>3</sub>N<sub>4</sub></b>                               | <b>0.2</b> | <b>MB, CR</b> | <b>10, 25</b> | <b>18 W LED lamp (&gt;420 nm)</b>   | <b>~100</b> | <b>95</b>  | <b>This work</b> |
| CoFe <sub>2</sub> O <sub>4</sub> /g-C <sub>3</sub> N <sub>4</sub>                   | 0.5        | MB, CR, MO    | 25, 25, 10    | 150 W Xe lamp simulated solar light | ~100        | 180        | 20               |
| <i>(In the presence of 30%H<sub>2</sub>O<sub>2</sub>)</i>                           |            |               |               |                                     |             |            |                  |

## Reference

1. Y. Chen, F. Su, H. Xie, R. Wang, C. Ding, J. Huang, Y. Xu and L. Ye, *Chemical Engineering Journal*, 2021, **404**, 126498.
2. Q. Liang, C. Zhang, S. Xu, M. Zhou, Y. Zhou and Z. Li, *Journal of Colloid and Interface Science*, 2020, **577**, 1-11.
3. D. Kim and K. Yong, *Applied Catalysis B: Environmental*, 2021, **282**, 119538.
4. C. Feng, L. Tang, Y. Deng, J. Wang, Y. Liu, X. Ouyang, H. Yang, J. Yu and J. Wang, *Applied Catalysis B: Environmental*, 2021, **281**, 119539.
5. Z.-A. Lan, G. Zhang and X. Wang, *Applied Catalysis B: Environmental*, 2016, **192**, 116-125.
6. C. Liu, Y. Zhang, F. Dong, A. Reshak, L. Ye, N. Pinna, C. Zeng, T. Zhang and H. Huang, *Applied Catalysis B: Environmental*, 2017, **203**, 465-474.
7. J. Ran, T. Y. Ma, G. Gao, X.-W. Du and S. Z. Qiao, *Energy & Environmental Science*, 2015, **8**, 3708-3717.
8. J. Cao, H. Fan, C. Wang, J. Ma, G. Dong and M. Zhang, *Ceramics International*, 2020, **46**, 7888-7895.
9. Y. Luo, J. Wang, S. Yu, Y. Cao, K. Ma, Y. Pu, W. Zou, C. Tang, F. Gao and L. Dong, *Journal of Materials Research*, 2018, **33**, 1268-1278.
10. Z.-F. Huang, J. Song, L. Pan, Z. Wang, X. Zhang, J.-J. Zou, W. Mi, X. Zhang and L. Wang, *Nano Energy*, 2015, **12**, 646-656.
11. L. Yang, J. Huang, L. Shi, L. Cao, Q. Yu, Y. Jie, J. Fei, H. Ouyang and J. Ye, *Applied Catalysis B: Environmental*, 2017, **204**, 335-345.
12. Y. Wang, F. Silveri, M. K. Bayazit, Q. Ruan, Y. Li, J. Xie, C. R. A. Catlow and J. Tang, *Advanced Energy Materials*, 2018, **8**, 1801084.
13. M. Wu, J. M. Yan, X. n. Tang, M. Zhao and Q. Jiang, *ChemSusChem*, 2014, **7**, 2654-2658.
14. Y. Li, S. Zhu, Y. Liang, Z. Li, S. Wu, C. Chang, S. Luo and Z. Cui, *Applied Surface Science*, 2021, **536**, 147743.
15. C. Wang, W. Wang, H. Fan, N. Zhao, J. Ma, M. Zhang and A. K. Yadav, *ACS applied materials & interfaces*, 2019, **12**, 5234-5243.

16. S. Hu, L. Ma, J. You, F. Li, Z. Fan, G. Lu, D. Liu and J. Gui, *Applied surface science*, 2014, **311**, 164-171.
17. Q. Liu, J. Shen, X. Yu, X. Yang, W. Liu, J. Yang, H. Tang, H. Xu, H. Li and Y. Li, *Applied Catalysis B: Environmental*, 2019, **248**, 84-94.
18. J. Wang, G. Wang, B. Cheng, J. Yu and J. Fan, *Chinese Journal of Catalysis*, 2021, **42**, 56-68.
19. M. B. Shekardasht, M. H. Givianrad, P. Gharbani, Z. Mirjafary and A. Mehrizad, *Diamond and Related Materials*, 2020, **109**, 108008.
20. D. Gogoi, P. Makkar and N. N. Ghosh, *ACS omega*, 2021, **6**, 4831-4841.
21. S. P. Pattnaik, A. Behera, R. Acharya and K. Parida, *Journal of Environmental Chemical Engineering*, 2019, **7**, 103456.
22. C. Li, Z. Sun, X. Li, L. Liu and S. Zheng, *Advanced Powder Technology*, 2016, **27**, 2051-2060.
23. A. Kumar, S. Singh and M. Khanuja, *Materials Chemistry and Physics*, 2020, **243**, 122402.
24. M. Chegeni, F. Goudarzi and M. Soleymani, *ChemistrySelect*, 2019, **4**, 13736-13745.
25. A. S. Vig, N. Rani, A. Gupta and O. Pandey, *Solar Energy*, 2019, **185**, 469-479.
26. S. J. Lee, T. Begildayeva, H. J. Jung, R. Koutavarapu, Y. Yu, M. Choi and M. Y. Choi, *Chemosphere*, 2021, **263**, 128262.
27. S. Barman and S. Basu, *Chemosphere*, 2020, **241**, 124981.
28. Y. Zhang, J. Zhou, Q. Feng, X. Chen and Z. Hu, *Chemosphere*, 2018, **212**, 523-532.
29. M. Jourshabani, Z. Shariatinia and A. Badiei, *Applied Surface Science*, 2018, **427**, 375-387.
30. M. Jourshabani, Z. Shariatinia and A. Badiei, *Journal of colloid and interface science*, 2017, **507**, 59-73.
31. W. J. Kim, E. Jang and T. J. Park, *Applied Surface Science*, 2017, **419**, 159-164.
32. G. R. Surikanti, P. Bajaj and M. V. Sunkara, *ACS omega*, 2019, **4**, 17301-17316.
